# Supplementary material for: Assembly of ZIF-67 nanoparticles and in situ grown Cu(OH)2 nanowires serves as an effective electrocatalyst for oxygen evolution
Source: Royal Society of Chemistry journal article supplement (doi:10.1039/d1dt01025e), 2021-01-01
Supplement: d1dt01025e1.pdf [file d1dt01025e1.pdf]

Supporting Information

**Assembly of ZIF-67 nanoparticles and in-situ grown Cu(OH)<sub>2</sub> nanowires serves as an effective electrocatalyst for oxygen evolution**

Lei Ye <sup>a</sup>, Yeqing Zhang <sup>a</sup>, Linxiu Zhao <sup>a</sup>, Limin Wang <sup>a</sup>, Yaqiong Gong <sup>a,b,\*</sup>

*a School of Chemical Engineering and Technology, North University of China, Taiyuan, 030051, P. R. China.*

*b State Key Laboratory of Physical Chemistry of Solid Surfaces, Xiamen University, Xiamen 361005, Fujian, China.*

\* Email: [gyq@nuc.edu.cn](mailto:gyq@nuc.edu.cn) (Yaqiong Gong)

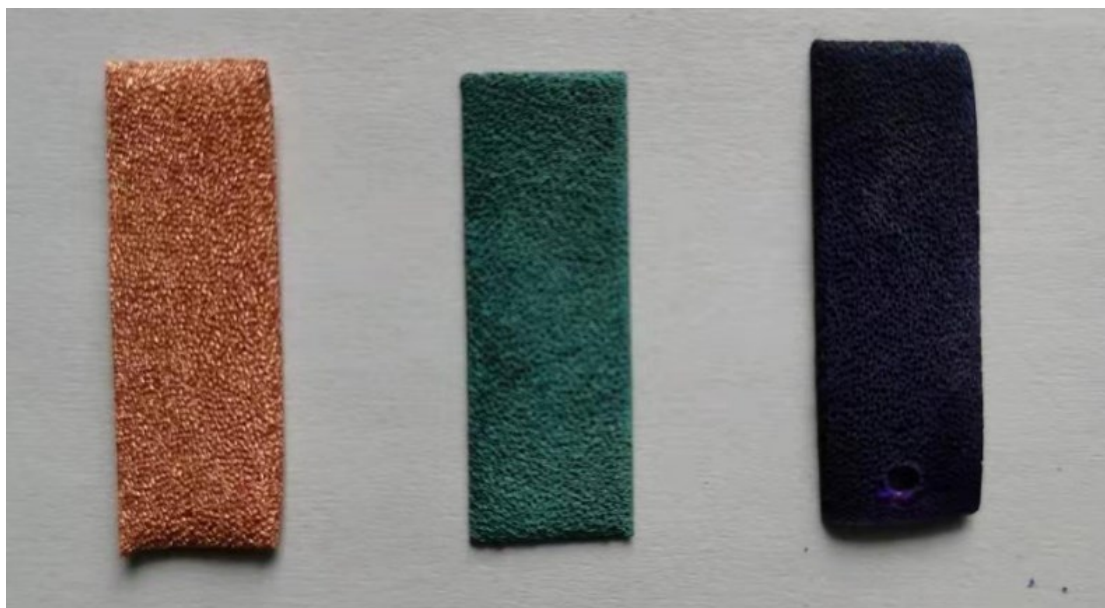

**Fig. S1.** Picture of the composite samples, the order from left to right is CF,  $\text{Cu}(\text{OH})_2/\text{CF}$  and  $\text{Cu}(\text{OH})_2@ZIF-67/\text{CF}$ .

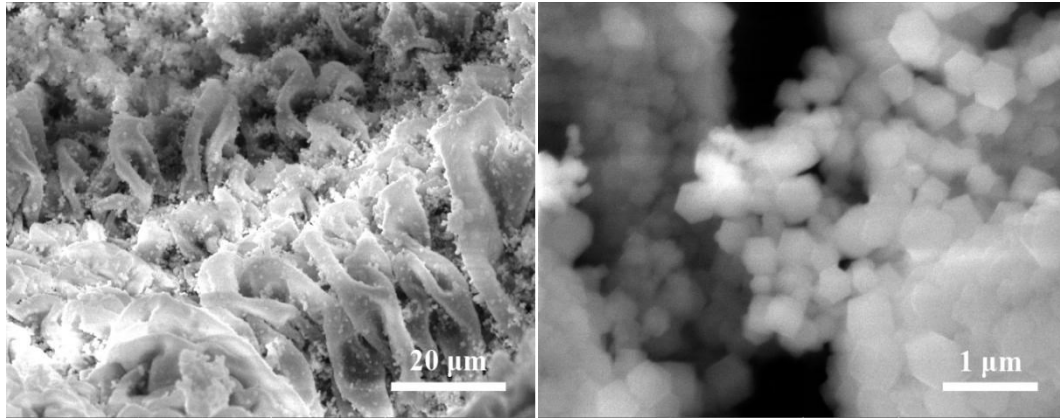

**Fig. S2.** SEM images of ZIF-67/CF.

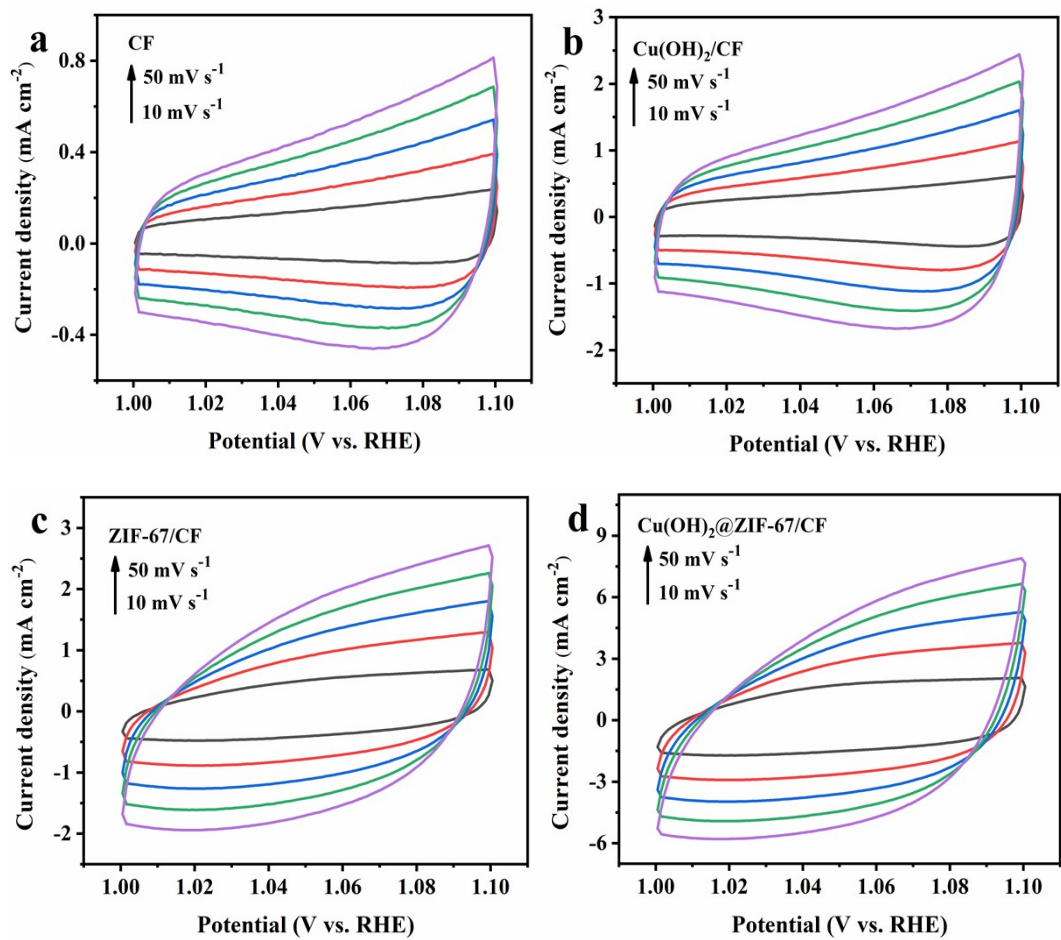

**Fig. S3.** Cyclic voltammetry curves of (a) CF, (b) Cu(OH)<sub>2</sub>/CF, (c) ZIF-67/CF and (d) Cu(OH)<sub>2</sub>@ZIF-67/CF.

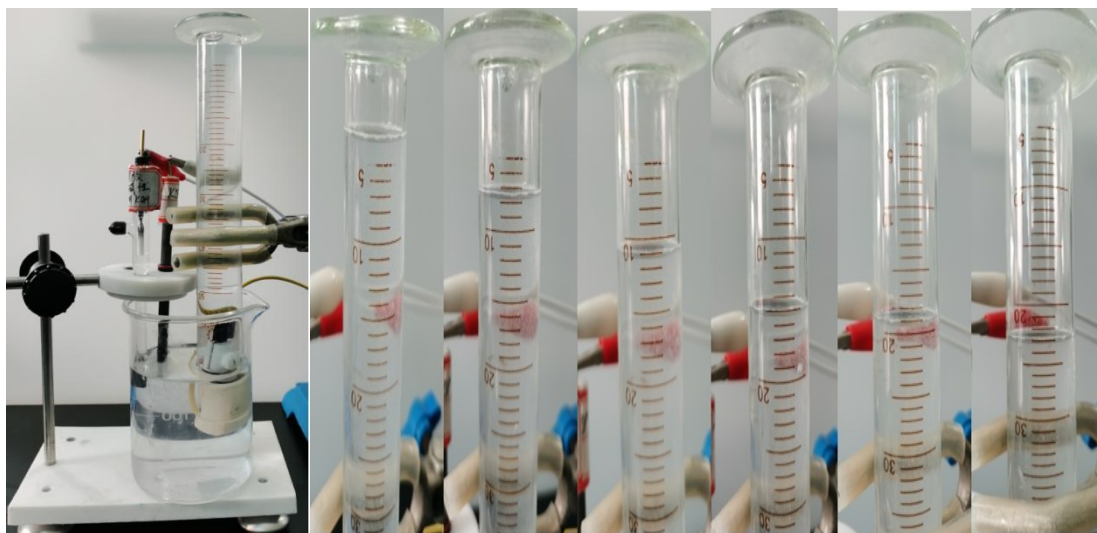

**Fig. S4.** Digital photograph of the experimental measurement of the oxygen production of  $\text{Cu}(\text{OH})_2@Z\text{IF}-67/\text{CF}$  electrocatalyst at a current density of  $100 \text{ mA}\cdot\text{cm}^{-2}$  is presented.

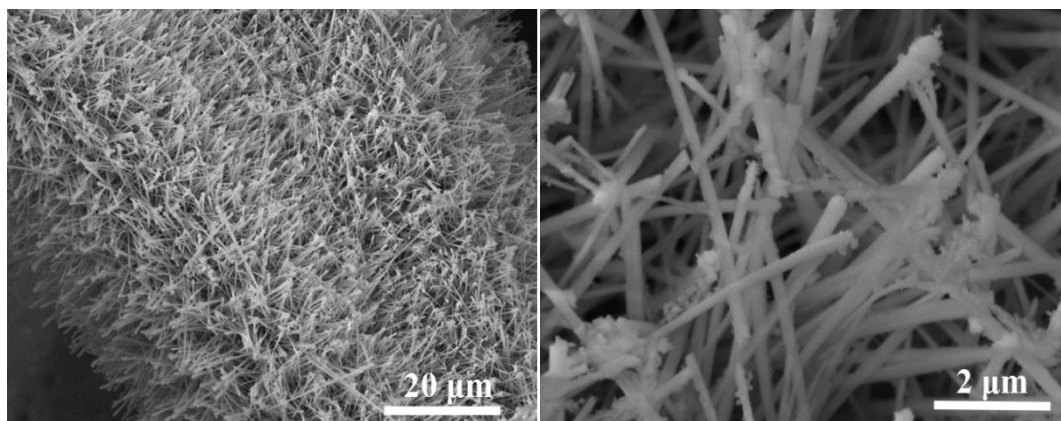

**Fig. S5.** SEM images of  $\text{Cu}(\text{OH})_2@\text{ZIF-67}/\text{CF}$  after 22 hours stability measurements.

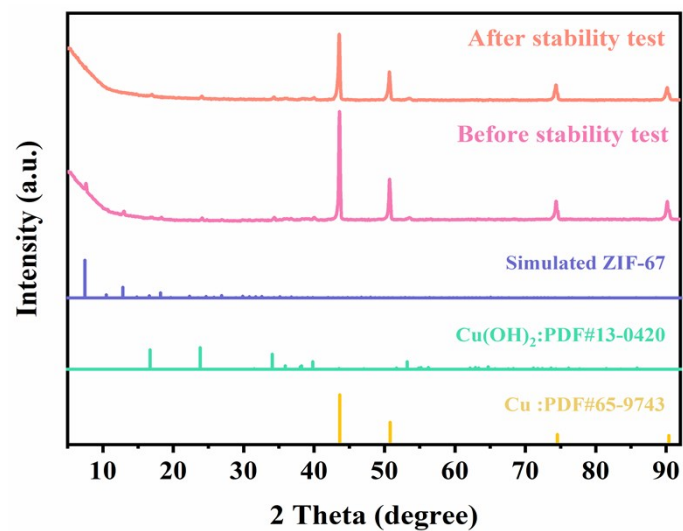

**Fig. S6.** XRD pattern of Cu(OH)<sub>2</sub>@ZIF-67/CF before and after stability.

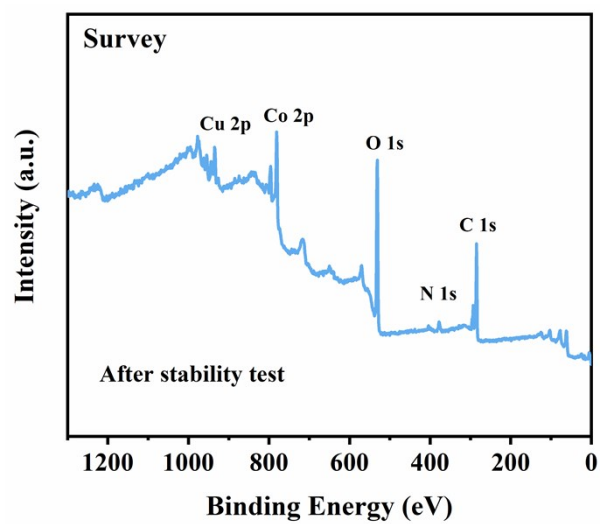

**Fig. S7.** XPS survey spectrum of  $\text{Cu}(\text{OH})_2@Z\text{IF-67}/\text{CF}$  after stability test.



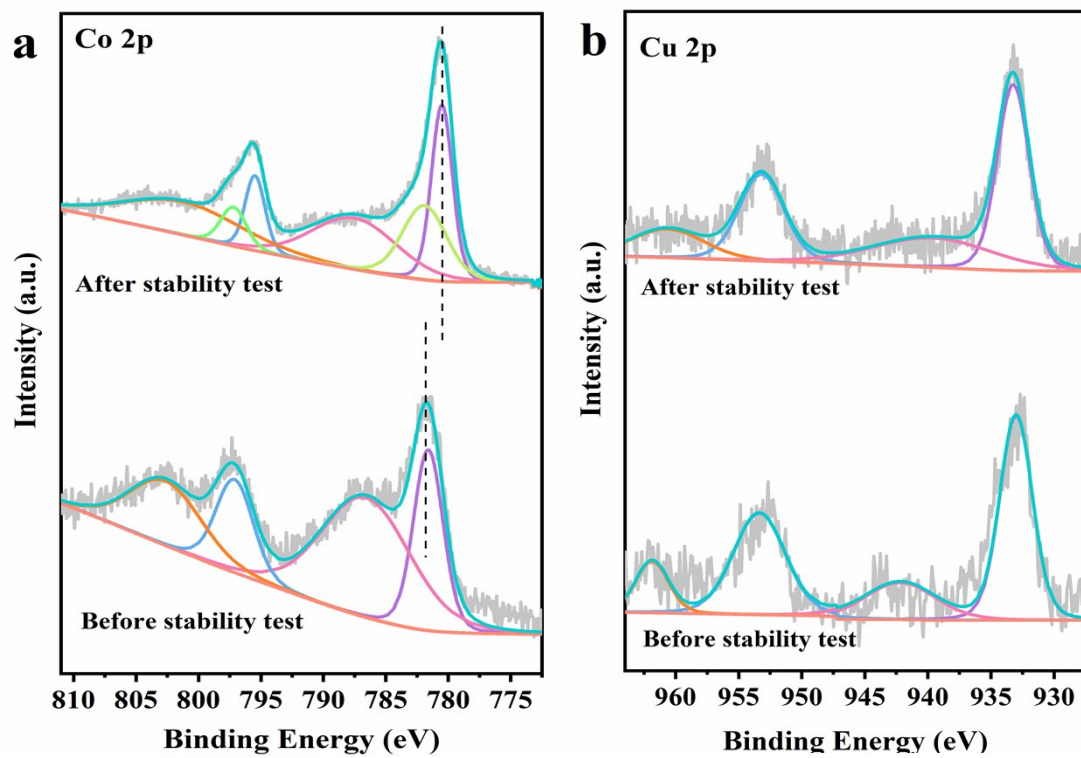

**Fig. S8.** Comparison of XPS spectra before and after stability test, (a) Co 2p, (b) Cu 2p.

**Table S1.** Comparison of OER activity between Cu(OH)<sub>2</sub>@ZIF-67/CF and other recently reported non noble metal catalysts.

| <b>Catalyst</b>                             | <b>Current density<br/>(mA·cm<sup>-2</sup>)</b> | <b>Overpotential<br/>(mV)</b> | <b>Tafel slope<br/>(mV·dec<sup>-1</sup>)</b> | <b>Reference</b> |
|---------------------------------------------|-------------------------------------------------|-------------------------------|----------------------------------------------|------------------|
| Cu(OH) <sub>2</sub> @ZIF-67/CF              | 10                                              | 205                           | 70.5                                         | this work        |
| Co LDHs UTNSs                               | 10                                              | 340                           | 56                                           | 1                |
| SiW <sub>9</sub> Co <sub>3</sub> [h]@ZIF-67 | 10                                              | 420                           | 93.9                                         | 2                |
| EG/Co(OH) <sub>2</sub> /ZIF-67              | 10                                              | 280                           | 63                                           | 3                |
| Co-Mo-N-PHP                                 | 10                                              | 294                           | 57                                           | 4                |
| ZIF-67@CoFe-PBA-F-250                       | 10                                              | 297                           | 34                                           | 5                |
| CUMSSs-ZIF-67                               | 10                                              | 320                           | 185.1                                        | 6                |
| 50% PANI/ZIF-67                             | 10                                              | 350                           | 57                                           | 7                |
| Cu(OH) <sub>2</sub> @CoNiCH NTs/CF          | 30                                              | 288                           | 74                                           | 8                |
| Cu(OH) <sub>2</sub> @Co(OH) <sub>2</sub>    | 10                                              | 283                           | 48                                           | 9                |
| CuO@CoZn-LDH/CF                             | 10                                              | 194                           | 78.3                                         | 10               |

## Reference

- 1 X. Xu, Z. Zhong, X. Yan, L. Kang and J. Yao, *J. Mater. Chem. A*, 2018, **6**, 5999-6006.
- 2 V. K. Abdelkader-Fernández, D. M. Fernandes, S. S. Balula, L. Cunha-Silva and C. Freire, *J. Mater. Chem. A*, 2020, **8**, 13509-13521.
- 3 J. Cao, C. Lei, J. Yang, X. Cheng, Z. Li, B. Yang, X. Zhang, L. Lei, Y. Hou and K. Ostrikov, *J. Mater. Chem. A*, 2018, **6**, 18877-18883.
- 4 H. Chu, D. Zhang, B. Jin and M. Yang, *Appl. Catal. B Environ.*, 2019, **255**, 117744.
- 5 X. Gu, Z. Liu, H. Liu, C. Pei and L. Feng, *Chem. Eng. J.*, 2021, **403**, 126371.
- 6 L. Tao, C.Y. Lin, S. Dou, S. Feng, D. Chen, D. Liu, J. Huo, Z. Xia and S. Wang, *Nano Energy*, 2017, **41**, 417-425.
- 7 M. Khalid, A. M. B. Honorato, H. Varela and L. Dai, *Nano Energy*, 2018, **45**, 127-135.
- 8 J. Kang, J. Sheng, J. Xie, H. Ye, J. Chen, X.Z. Fu, G. Du, R. Sun and C. P. Wong, *J. Mater. Chem. A*, 2018, **6**, 10064-10073.
- 9 S. Tang, X. Li, M. Courté, J. Peng and D. Fichou, *ChemCatChem*, 2020, **12**, 4038-4043.
- 10 L. Yin, X. Du, C. Di, M. Wang, K. Su and Z. Li, *Chem. Eng. J.*, 2021, **414**, 128809.
